# Supplementary material for: Super-assembled silica nanoprobes for intracellular Zn(ii) sensing and reperfusion injury treatment through in situ MOF crystallization
Source: Royal Society of Chemistry journal article supplement (doi:10.1039/d1an01475g), 2021-01-01
Supplement: d1an01475g1.pdf [file d1an01475g1.pdf]

**This journal is © The Royal Society of Chemistry 2021**

## **Electronic Supplementary Information**

### **Super-assembled Silica Nanoprobes for Intracellular Zn Ion Sensing and Reperfusion Injury Treatment through in-situ MOF Crystallization**

Qingdong Chai,<sup>a</sup> Lei Xie,<sup>b</sup> Meng Gao,<sup>\*c</sup> Yingnan Liu,<sup>a</sup> Xiangyu Xu,<sup>d</sup> Xiaohong Huang,<sup>d</sup> Pu Chen,<sup>e</sup> Tong Wu,<sup>d</sup> Qi Wan,<sup>\*d</sup> and Biao Kong<sup>\*b</sup>

<sup>a</sup> *Institute of Advanced Cross-field Science, College of Life Science, Qingdao University, Qingdao 266071, P. R. China*

<sup>b</sup> *Collaborative Innovation Center of Chemistry for Energy Materials (iChEM), Department of Chemistry, Laboratory of Advanced Materials, Shanghai Key Laboratory of Molecular Catalysis and Innovative Materials, Fudan University, Shanghai 200433, P. R. China. Email addresses: [bkong@fudan.edu.cn](mailto:bkong@fudan.edu.cn)*

<sup>c</sup> *National Supercomputer Research Center of Advanced Materials, Advanced Materials Institute, Qilu University of Technology (Shandong Academy of Sciences), Jinan 250014, P. R. China*

<sup>d</sup> *Institute of Neuroregeneration & Neurorehabilitation, Qingdao University, 308 Ningxia Street, Qingdao 266071, China*

<sup>e</sup> *Department of Chemical Engineering, University of Waterloo, Waterloo, Ontario N2L 3G1, Canada*

<sup>\*</sup> *Address correspondence to Biao Kong (B.K.);*

*Email addresses: [bkong@fudan.edu.cn](mailto:bkong@fudan.edu.cn)*

**This ESI includes:**

Figure S1. The synthesis process of probe PZn through a mild Schiff base reaction.

Figure S2.  $^1\text{H}$  NMR spectrum of probe PZn.

Figure S3. TEM image, SEM image and size distribution of P@MSN@ZIF8.

Figure S4. Fluorescence spectra and visual fluorescence color of PZn treated with various metal ions.

Figure S5. Fluorescence intensity of PZn at different stoichiometric ratios of  $\text{Zn}^{2+}$  and PZn.

Figure S6. The relative fluorescence intensity of the PZn after adding 2MI at different concentration ratios and various times.

Figure S7. In vitro cytotoxicity assay of 2MI-P@MSN on SH-SY5Y cells.

Figure S8. The cell viability of SH-SY5Y cells incubated with P@MSN and 2MI-P@MSN and treated with OGD/R for 6 hours.

Table S1. Surface properties of MSN-NH<sub>2</sub> and 2MI-P@MSN samples.

Table S2. Comparison with the recent work on  $\text{Zn}^{2+}$  probe.

References

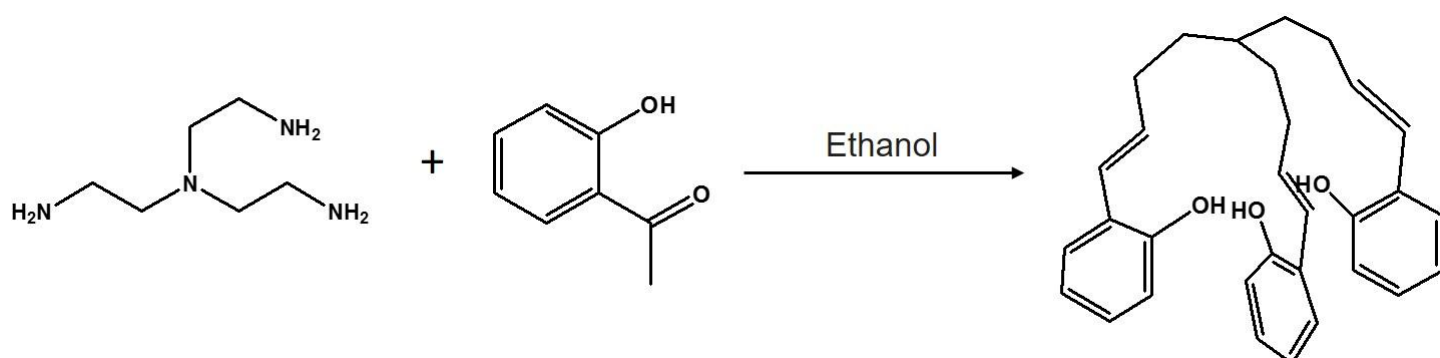

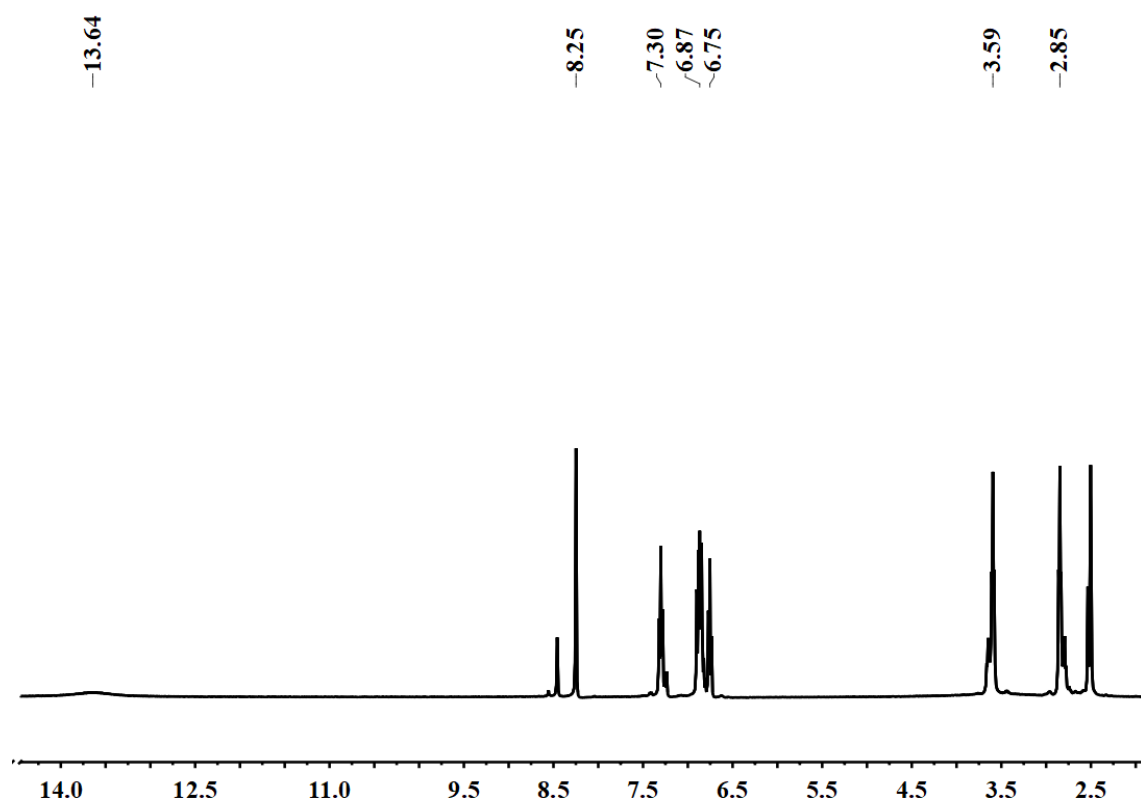

**Figure S2.**  $^1\text{H}$  NMR spectrum of PZn probe.

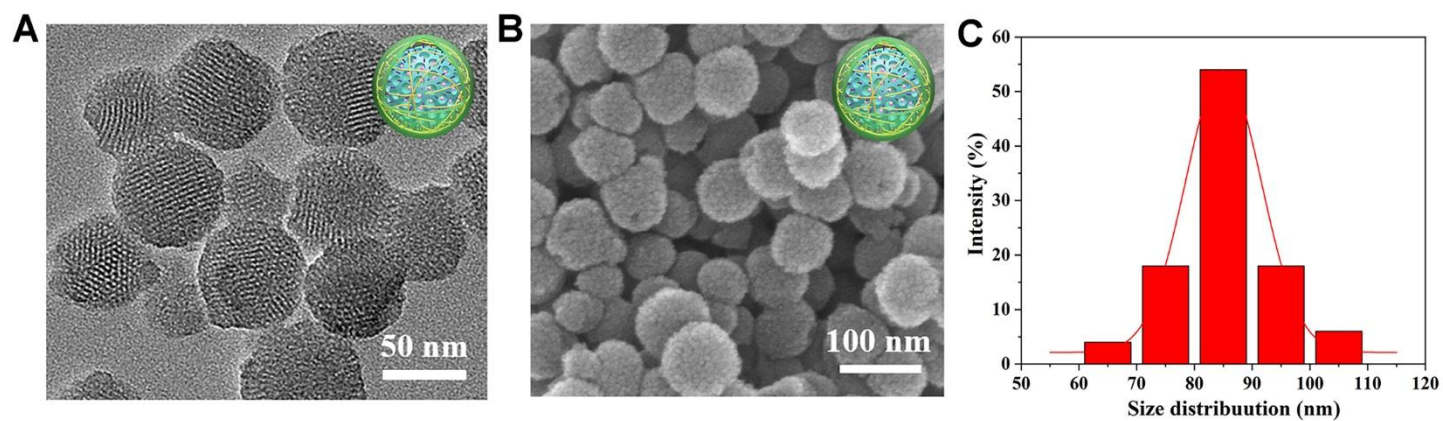

**Figure S3.** (A) TEM image of P@MSN@ZIF8 incubated with zinc ion for 3 hours. (B) SEM image of P@MSN@ZIF8. (C) Size distribution of P@MSN@ZIF8.

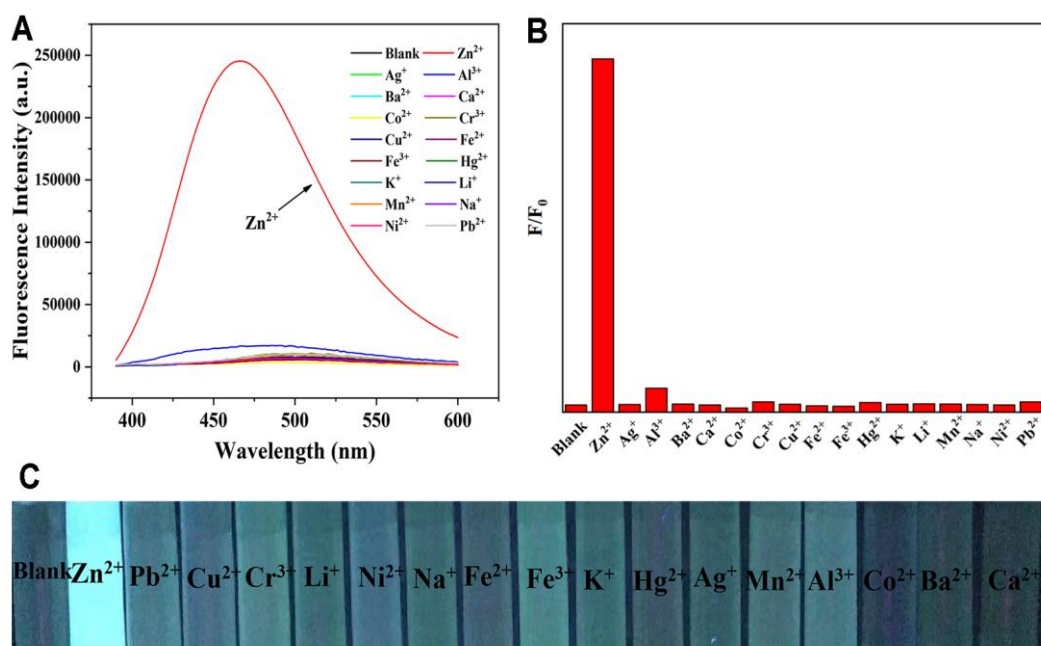

**Figure S4.** (A) Fluorescence spectra of PZn treated with various metal ions ( $\text{Zn}^{2+}$ ,  $\text{Ag}^+$ ,  $\text{Al}^{3+}$ ,  $\text{Ba}^{2+}$ ,  $\text{Ca}^{2+}$ ,  $\text{Co}^{2+}$ ,  $\text{Cr}^{3+}$ ,  $\text{Cu}^{2+}$ ,  $\text{Fe}^{3+}$ ,  $\text{Fe}^{2+}$ ,  $\text{Hg}^{2+}$ ,  $\text{K}^+$ ,  $\text{Li}^+$ ,  $\text{Mn}^{2+}$ ,  $\text{Na}^+$ ,  $\text{Ni}^{2+}$ ,  $\text{Pb}^{2+}$ ) and blank group. (B) Fluorescence ratio of PZn at 466 nm treated with multiple metal ions.  $F_0$  was the fluorescence intensity in  $\text{Zn}^{2+}$  solution and  $F$  was the fluorescence emission intensity of the PZn in various metal ions solution, respectively. (C) The visual fluorescence color of PZn under ultraviolet light after the addition of various metal ions.

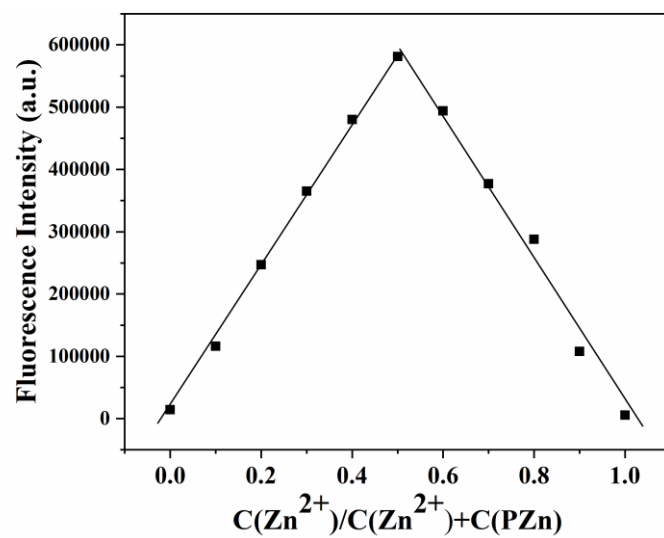

**Figure S5.** Fluorescence intensity of PZn at different stoichiometric ratios of  $\text{Zn}^{2+}$  and PZn. The total concentration was  $1 \times 10^{-4} \text{ M}$ .

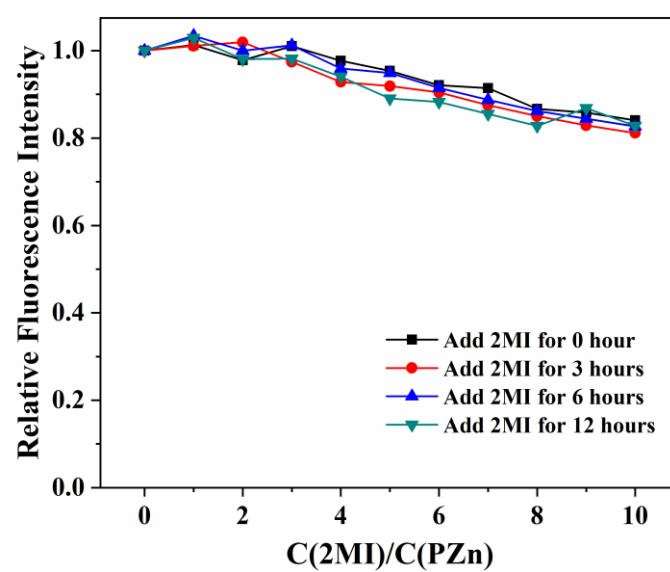

**Figure S6.** The relative fluorescence intensity of the PZn after adding 2MI at different concentration ratios and various times.

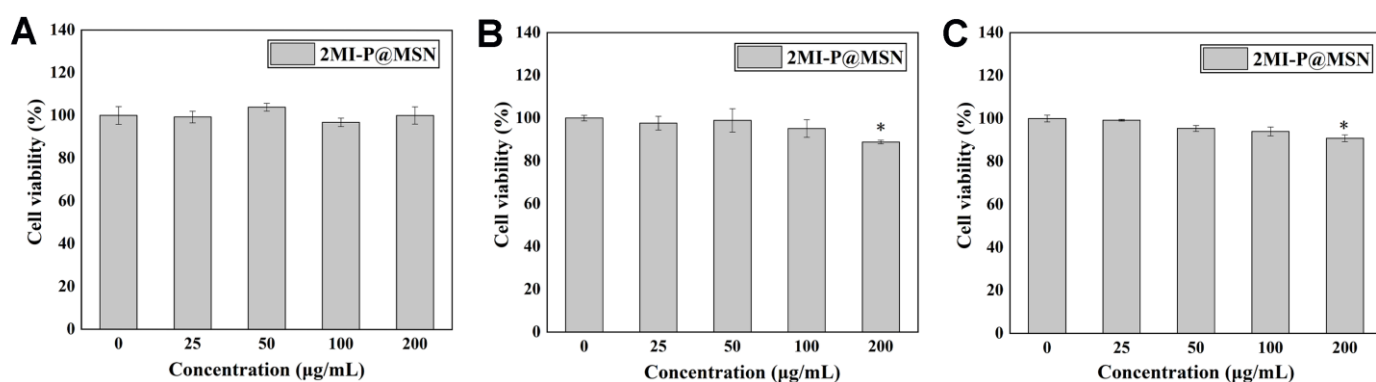

**Figure S7.** In vitro cytotoxicity assay of 2MI-P@MSN on SH-SY5Y cells. (A-C) The cell viability of SH-SY5Y cells incubated with various concentrations of 2MI-P@MSN for 3, 6, 12 hours, respectively. \*P < 0.05 and \*\*P < 0.01.

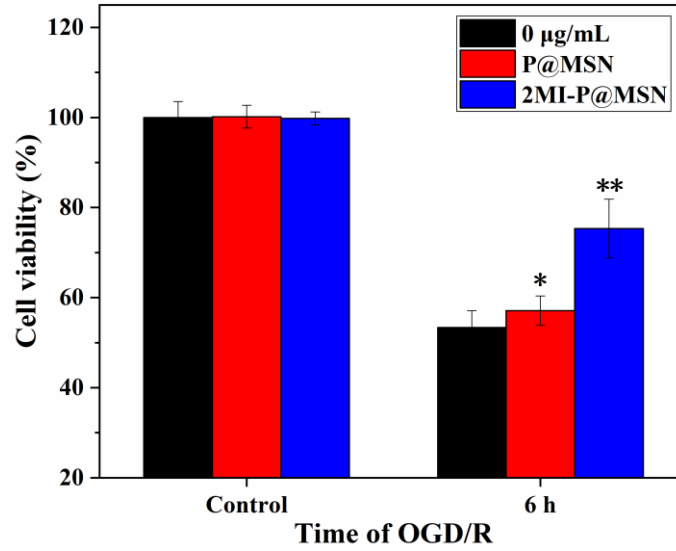

**Figure S8.** The cell viability of SH-SY5Y cells incubated with P@MSN and 2MI-P@MSN and treated with OGD/R for 6 hours. The control was the cell viability of SH-SY5Y cells incubated with 0 and 25 µg/mL of P@MSN and 2MI-P@MSN. The 6 h was the cell viability of SH-SY5Y cells treated with OGD 3 hours and reperfusion for 6 hours. \* $P < 0.05$  and \*\* $P < 0.01$ .

|                   | MSN-NH <sub>2</sub> | 2MI-P@MSN |
|-------------------|---------------------|-----------|
| $S_{BET} (m^2/g)$ | 897.398             | 267.023   |
| $V_t (cm^3/g)$    | 0.947               | 0.632     |
| $D_{BJH} (nm)$    | 2.11                | 1.96      |

**Table S1.** Surface properties of MSN-NH<sub>2</sub> and 2MI-P@MSN samples. The  $S_{BET}$  was the Brunauer–Emmett–Teller (BET) surface area,  $V_t$  was the pore volume,  $D_{BJH}$  was the Barrett-Joyner-Halenda (BJH) pore size distribution.

| No. | Emission Wavelength | Detection Limit (LOD)  | Stoichiometric Ratio | Solvent                                           | Function                                       | Reference |
|-----|---------------------|------------------------|----------------------|---------------------------------------------------|------------------------------------------------|-----------|
| 1   | 410 nm              | $5.2 \times 10^{-7}$ M | 1:3                  | DMF/H <sub>2</sub> O<br>(6:4, v/v)                | Zn <sup>2+</sup> detection                     | [S1]      |
| 2   | 450 nm              | $3.5 \times 10^{-7}$ M | 1:1                  | Ethanol                                           | Zn <sup>2+</sup> detection                     | [S2]      |
| 3   | 365 nm、555 nm       | $5.0 \times 10^{-8}$ M | 1:1                  | Ethanol                                           | Zn <sup>2+</sup> detection                     | [S3]      |
| 4   | 405 nm              | $4.2 \times 10^{-7}$ M | 1:1                  | HEPES<br>buffer<br>with 0.01%<br>Triton X-100     | Zn <sup>2+</sup> detection                     | [S4]      |
| 5   | 560 nm              | $1.7 \times 10^{-8}$ M | 1:1                  | CH <sub>3</sub> CN/H <sub>2</sub> O<br>(1:1, v/v) | Zn <sup>2+</sup> detection                     | [S5]      |
| 6   | 535 nm              | $3.8 \times 10^{-8}$ M | 1:1                  | MeOH/H <sub>2</sub> O<br>(4:1, v/v)               | Zn <sup>2+</sup> detection                     | [S6]      |
| 7   | 466 nm              | $1.6 \times 10^{-7}$ M | 1:1                  | H <sub>2</sub> O                                  | Zn <sup>2+</sup> detection, cell<br>protection | This work |

**Table S2.** Comparison with the recent work on Zn<sup>2+</sup> probe.

The performance of the Zn<sup>2+</sup> ion probe proposed in this work was compared with other reported methods in literatures. According to Table S2, relatively low LOD was achieved by 2MI-P@MSN in this work. Moreover, 2MI-P@MSN showed high selectivity and sensitivity towards detection of Zn<sup>2+</sup> ion in aqueous solutions and living cells. In addition to intracellular zinc ion imaging, 2MI-P@MSN also protected cells from reperfusion injury. In summary, the proposed method in this work realized the integration of detection effects and protection effects into a multi-functional material framework and obtained satisfactory results.

## References

- [S1] L. Z. Liu, L. Wang, M. Yu, Q. Zhao, Y. Zhang, Y. X. Sun and W. K. Dong, *Spectrochim Acta A Mol Biomol Spectrosc* **2019**, 222, 117209.
- [S2] L. Fan, J. C. Qin, C. R. Li and Z. Y. Yang, *Spectrochim Acta A Mol Biomol Spectrosc* **2020**, 236, 118347.
- [S3] H. Diao, L. Guo, W. Liu and L. Feng, *Spectrochim Acta A Mol Biomol Spectrosc* **2018**, 196, 274-280.
- [S4] G. Zhang, Y. Zhao, B. Peng, Z. Li, C. Xu, Y. Liu, C. Zhang, N. H. Voelcker, L. Li and W. Huang, *J Mater Chem B* **2019**, 7, 2252-2260.
- [S5] H. Fang, P. C. Huang and F. Y. Wu, *Spectrochim Acta A Mol Biomol Spectrosc* **2019**, 214, 233-238.
- [S6] J. Fu, Y. Chang, B. Li, X. Wang, X. Xie and K. Xu, *Spectrochim Acta A Mol Biomol Spectrosc* **2020**, 225, 117493.
